# Supplementary material for: Crystal structure, electronic structure and physical properties of the new quaternary chalcogenides Tl2NdAg3Se4 and Tl2NdAg3Te4
Source: Royal Society of Chemistry journal article supplement (doi:10.1039/c6qi00436a), 2016-12-15
Supplement: c6qi00436a1.pdf [file c6qi00436a1.pdf]

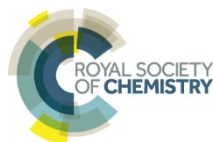

ARTICLE

**Crystal structure, electronic structure and physical properties of the new quaternary chalcogenides  $\text{Ti}_2\text{NdAg}_3\text{Se}_4$  and  $\text{Ti}_2\text{NdAg}_3\text{Te}_4$**

Received 00th January 20xx,  
Accepted 00th January 20xx

A. Assoud, Q. Guo, C. R. Sankar and H. Kleinke\*

DOI: 10.1039/x0xx00000x

[www.rsc.org/](http://www.rsc.org/)

**Supporting Information**

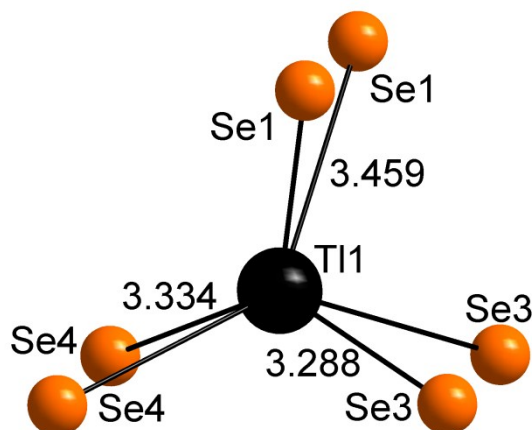

Coordination sphere around the Ti1 atom.

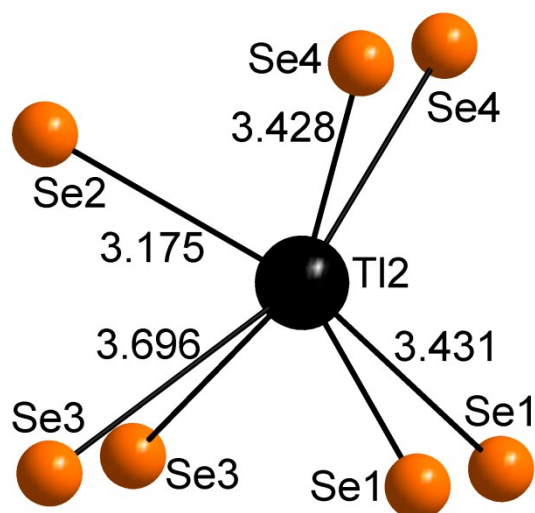

Coordination sphere around the Ti2 atom.

Department of Chemistry and Waterloo Institute for Nanotechnology  
University of Waterloo, ON, Canada N2L 3G1  
Email: [kleinke@uwaterloo.ca](mailto:kleinke@uwaterloo.ca)

† Dedicated to Prof. Mercouri G. Kanatzidis  
Electronic Supplementary Information (ESI) available: two crystallographic  
information files. See DOI: 10.1039/x0xx00000x
